# Supplementary material for: Matrix Effect Evaluation and Method Validation of 181 Pesticides in Three Types of Tea Using Gas Chromatography-Tandem Mass Spectrometry
Source: Research Square preprint supplement (doi:10.21203/rs.3.rs-6267369/v1), 2025-04-15
Supplement: Supplementary file 1 [file 7f99bce8f1ee8d1a6da3dfb1.docx]

Supporting Information**Matrix Effect Evaluation and Method Validation of 181 Pesticides in Three Types of Tea Using Gas Chromatography-Tandem Mass Spectrometry**

Danyang Zhang1,2 Xiaoning Yang3, Lei Zhu1,2, Miao Yu4,*, Menglu Chen5, Qinghua Wang1,2, Ying Jiang1,2, Hongping Chen1,2, Yunfeng Chai1,2*

1 National Key Laboratory for Tea Plant Germplasm Innovation and Resource Utilization, Tea Research Institute, Chinese Academy of Agricultural Sciences, Hangzhou 310008, China

2 Laboratory of Quality and Safety Risk Assessment for Tea Products (Hangzhou), Ministry of Agriculture and Rural Affairs, Hangzhou 310008, China

3 Hangzhou Boyin Biotechnology Co., LTD., Hangzhou, 311188, China

4 Zhejiang Provincial Plant Protection Quarantine and Pesticide Management Institute, Hangzhou 310020, China

5 Zhejiang Huamingyuan Tea Co., Ltd., Yongkang, 321300, China

* Corresponding author at: National Key Laboratory for Tea Plant Germplasm Innovation and Resource Utilization, Tea Research Institute, Chinese Academy of Agricultural Sciences, Hangzhou 310008, China. E-mail: [chaiyunfeng@tricaas.com](mailto:chaiyunfeng@tricaas.com) (Y. Chai).

Zhejiang Provincial Plant Protection Quarantine and Pesticide Management Institute, Hangzhou 310020, China. E-mail: yumiao2020@sina.com (M. Yu).

Table S1 GC-MS/MS protocol for the analysis of high throughput pesticide residues in tea.

| No. | Tea samples | Numbers of pesticide | GC column | Mass spectrometry | Ionization | Monitoring mode | Accuracy expressed as recoveries (%) | Precision expressed as RSD (%) | Sensitivity expressed as limit of quantification (μg/kg) | Reference |
| --- | --- | --- | --- | --- | --- | --- | --- | --- | --- | --- |
| 1 | Green tea | 203 | DB-5ms (30 m x 0.25 mm i.d., 0.5 µm film thickness) | Triple quadrupole mass spectrometer | EI+ | MRM | 70-120 | < 20% | 1-25 | (Ly et al., 2020a) |
| 2 | Wuyi Rock tea | 33 | DB-5ms (30 m x 0.25 mm i.d., 0.25 µm thick film) | Triple quadrupole mass spectrometer | EI | MRM | 72.3-110.6 | 2.8-6.7% | 1.8-15.5 | (Xu et al., 2021) |
| 3 | Green tea | 166 | DB-5ms(30 m x 0.25 mm i.d., 0.25 µm film thickness) | Waters Xevo TQ-S micro-triple quadrupole mass spectrometer | APCI+ | SRM | 73-95 | <11% | 10 | (Saito-Shida et al., 2021b) |
| 4 | Tea | 300 | Rxi-5Sil MS (0.25 mm i.d., x 30 m,  0.25 µm ﬁlm thickness) | GCMS-TQ8050 triple-quadrupole | -- | MRM | 60-120 | ≤20% | 0.05-135 | (Beneta et al., 2018) |
| 5 | Green tea | 14 | DB-5 ms (30 m × 0.25 mm, 0.25 μm) | Triple  quadrupole mass selective detector | EI | Full scan | 81.2-118.9 | 18.9%(average) | 10-25 | (Fan et al., 2023) |
| 6 | White, green, oolong and black tea | 197 | Fused silica capillary(30 m × 0.25  mm i.d. and 0.5 µm fflm thickness) | Triple quadrupole  mass spectrometer | -- | -- | 70-120 | <20% | ≤10 | (Ly et al., 2022) |
| 7 | Green tea | 16 | DB-5 ms (30 m × 0.25 mm, 0.25 μm film  thickness with 10 m DuraGuard) | Xevo TQ-S micro tandem  mass spectrometer | APCI/EI | SRM | 77-102/80-120 | <14%/<17% | 10 | (Saito-Shida et al., 2020) |
| 8 | Green, yellow, white,  oolong, black, dark and pu'er tea | 205 | DB-1701(30 m × 0.25 mm id , 0.25 μm film  thickness) | Tandem mass spectrometry detector | EI | MRM | 70-119 | 0-15% | -- | (Li et al., 2018) |
| 9 | Green tea, black tea, and oolong tea | 131 | Rtx-5 ms,  (25 m × 0.25 mm × 0.25 µm) | Triple quadrupole  mass spectrometer | EI | MRM | 78.2-113.9 | <15.8% | 1.5-16.7 | (Zhu et al., 2019) |
| 10 | Black tea | 181 | SH–Rxi–5Sil MS (30 m, 0.25 mm i.d.,  0.25 µm film) | Triple quadruple detector | -- | -- | 70.69-111.98 | 0.27-9.98% | -- | (Tripathy et al., 2023) |
| 11 | Black tea | 33 | HP-5 (30 m × 0.25 mm I.D., 0.25-μm film thicknesses) | Triple quadruple detector | EI | MRM | 72-120 | 0.3-20% | 0.8-24 | (Heshmati et al.,2021) |
| 12 | Green tea, oolong tea, black tea, and puer tea | 128 | DB-1701 (30 m, 0.25 mm  i.d., 0.25 μm film thickness) | Triple quadrupole  mass spectrometer | EI | MRM | 70-120 | ≤20% | 1-5 | (Li et al., 2018b) |
| 13 | Tea | 20 | SH-Rtx-1701(30 m×0.25 mm,0.25μm） | Triple quadruple detector | EI | MRM | 73.65-99.25 | 0.078-11.210% | 0.0373-1.0513 | (Ni et al., 2024) |
| 14 | Black tea, white tea, green tea | 10 | TG-5MS(30m×0.25mm×0.25μm) | Triple quadruple detector | -- | -- | 85.7-96.8 |  | 0.013-0.018 | (Jiang et al., 2024) |

Table S2 Analysis of 181 pesticide residue parameters by gas chromatography tandem mass spectrometry

| No | Pesticide | MRM  transition (m/z) | Collision energy(eV) | MRM  transition (m/z) | Collision energy(eV) | Retention time |
| --- | --- | --- | --- | --- | --- | --- |
| 1 | aclonifen | 264.1＞194.2 | 15 | 212.1＞182.2 | 15 | 19.53 |
| 2 | acrinathrin | 288.9＞92.8 | 10 | 207.8＞181.1 | 20 | 24.78 |
| 3 | alachlor | 188.1＞160.2 | 10 | 160＞132.1 | 10 | 14.03 |
| 4 | aldrin | 262.9＞192.9 | 40 | 254.9＞220 | 20 | 15.07 |
| 5 | ametryn | 227＞170.1 | 15 | 227＞58.1 | 15 | 14.04 |
| 6 | anilofos | 225.9＞184 | 5 | 225.9＞157 | 15 | 23.09 |
| 7 | atratone | 211＞169.1 | 5 | 169＞154.1 | 5 | 11.65 |
| 8 | atrazine | 214.9＞200.2 | 5 | 214.9＞58.1 | 15 | 11.86 |
| 9 | atrazine-desethyl | 187＞172 | 5 | 172＞94 | 15 | 10.97 |
| 10 | azinphos-ethyl | 160＞77.1 | 20 | 132＞77.1 | 15 | 24.87 |
| 11 | beflubutamid | 221＞193.1 | 10 | 176.1＞91.1 | 15 | 16.51 |
| 12 | benalaxyl | 148＞105.1 | 20 | 148＞77 | 40 | 20.4 |
| 13 | benfluralin | 292＞264 | 10 | 292＞206 | 15 | 11.12 |
| 14 | benthiocarb | 124.9＞89 | 20 | 100＞72 | 5 | 14.91 |
| 15 | BHC-alpha | 218.9＞183 | 5 | 216.9＞181 | 10 | 11.49 |
| 16 | BHC-beta | 216.9＞181 | 10 | 181＞145 | 15 | 12.13 |
| 17 | BHC-delta | 217＞181.1 | 5 | 181.1＞145.1 | 15 | 12.85 |
| 18 | BHC-gamma | 216.9＞181 | 10 | 181＞145 | 15 | 12.25 |
| 19 | bifenox | 340.9＞309.9 | 10 | 189.1＞126 | 25 | 23.03 |
| 20 | bifenthrin | 181.2＞166.2 | 15 | 181.2＞165.2 | 35 | 22.51 |
| 21 | boscalid | 140＞112 | 10 | 140＞76 | 30 | 27.59 |
| 22 | bromfenvinfos | 268.9＞161.2 | 15 | 266.9＞159 | 15 | 17.7 |
| 23 | bromophos | 330.8＞315.8 | 20 | 328.8＞313.8 | 20 | 15.75 |
| 24 | bromopropylate | 185＞157 | 15 | 183＞155 | 15 | 22.4 |
| 25 | bupirimate | 272.9＞193.1 | 10 | 272.9＞108 | 20 | 18.51 |
| 26 | butamifos | 285.9＞202 | 15 | 200＞92 | 15 | 17.69 |
| 27 | carbophenothion | 199＞143.1 | 10 | 153＞96.8 | 10 | 20.34 |
| 28 | chlordane-trans | 372.8＞265.8 | 25 | 271.7＞236.9 | 20 | 16.97 |
| 29 | chlorfenvinphos | 322.8＞266.8 | 15 | 266.9＞159.1 | 20 | 16.42 |
| 30 | chlorobenzilate | 251.1＞139.1 | 20 | 139.1＞111 | 15 | 19.14 |
| 31 | chloroneb | 191＞141 | 10 | 191＞113 | 15 | 9.46 |
| 32 | chlorpropham | 153＞125.1 | 15 | 153＞90 | 25 | 10.84 |
| `33 | chlorpyrifos | 198.9＞171 | 15 | 196.9＞169 | 15 | 15.2 |
| 34 | chlorpyrifos-methyl | 287.9＞92.9 | 25 | 285.9＞92.9 | 25 | 13.84 |
| 35 | clomazone | 204.1＞107.1 | 25 | 125＞89 | 20 | 12.04 |
| 36 | cycloate | 154.1＞83.1 | 5 | 154.1＞72.1 | 5 | 10.66 |
| 37 | cyflufenamid | 118.1＞90 | 10 | 118.1＞89 | 30 | 18.83 |
| 38 | cyfluthrin | 226＞206 | 15 | 198.9＞170.1 | 30 | 27.32 |
| 39 | cypermethrin | 163＞127 | 5 | 163＞91 | 15 | 27.09 |
| 40 | cyproconazole | 222＞125.1 | 25 | 139＞111 | 15 | 18.8 |
| 41 | DDD-o,p' | 237＞165.2 | 30 | 235＞165.2 | 30 | 18.38 |
| 42 | DDD-p,p' | 236.9＞165.2 | 30 | 234.9＞165.3 | 30 | 19.55 |
| 43 | DDE-o,p' | 248＞176.2 | 40 | 246＞176.2 | 40 | 17.11 |
| 44 | DDE-p,p' | 315.8＞246.1 | 25 | 246.1＞176.1 | 40 | 18.1 |
| 45 | DDT-o,p' | 237＞165.2 | 30 | 235＞165.2 | 30 | 19.56 |
| 46 | DDT-p,p' | 237＞165.2 | 30 | 235＞165.2 | 30 | 20.69 |
| 47 | DEF | 202＞147 | 5 | 169＞57.1 | 5 | 18.07 |
| 48 | deltamethrin | 252.9＞93 | 20 | 250.7＞172 | 5 | 31.11 |
| 49 | dichlofenthion | 278.9＞222.9 | 15 | 222.9＞204.9 | 15 | 13.56 |
| 50 | diclofop-methyl | 339.9＞252.9 | 15 | 253＞162.1 | 20 | 21.26 |
| 51 | dicloran | 206.1＞176 | 15 | 160.1＞124.1 | 10 | 11.85 |
| 52 | dicofol | 250.9＞138.9 | 20 | 139＞111 | 15 | 15.34 |
| 53 | dicrotofos | 127＞109 | 10 | 127＞95 | 15 | 11.05 |
| 54 | difenoconazole | 322.8＞264.7 | 20 | 264.9＞202.1 | 20 | 30.4 |
| 55 | dimethoate | 142.9＞111 | 10 | 86.9＞46 | 20 | 11.82 |
| 56 | dioxathion | 271＞96.9 | 30 | 152.9＞96.9 | 10 | 26.37 |
| 57 | diphenylamine | 169＞168.2 | 15 | 168＞167.2 | 20 | 10.63 |
| 58 | dipropetryn | 255.1＞222.1 | 10 | 255.1＞180.1 | 20 | 14.82 |
| 59 | edifenphos | 201＞109 | 20 | 172.9＞109 | 10 | 20.48 |
| 60 | endosulfan-alpha | 194.9＞159 | 10 | 194.9＞125 | 30 | 17.35 |
| 61 | endosulfan-beta | 206.9＞172 | 20 | 194.9＞124.9 | 30 | 19.18 |
| 62 | endrin | 262.8＞193.1 | 40 | 244.8＞173 | 35 | 18.87 |
| 63 | EPN | 169＞141.1 | 5 | 169＞77.1 | 30 | 22.44 |
| 64 | epoxiconazole | 192＞138.1 | 10 | 192＞111 | 25 | 21.75 |
| 65 | ethalfluralin | 315.9＞275.9 | 10 | 275.9＞202.1 | 20 | 10.83 |
| 66 | ethion | 230.9＞175.1 | 10 | 230.9＞129.1 | 25 | 19.62 |
| 67 | ethofumesate | 206.9＞161.1 | 5 | 161＞105.1 | 10 | 14.65 |
| 68 | ethoprophos | 157.9＞114 | 5 | 157.9＞97 | 20 | 10.65 |
| 69 | etoxazole | 141＞113 | 20 | 141＞63.1 | 35 | 22.81 |
| 70 | etrimfos | 181＞153.1 | 10 | 168＞153.1 | 5 | 12.92 |
| 71 | famphur | 218＞109 | 20 | 218＞79 | 30 | 20.43 |
| 72 | fenamidone | 268＞180.2 | 25 | 238＞237.2 | 10 | 22.89 |
| 73 | fenarimol | 251＞139.1 | 20 | 219＞107.1 | 15 | 24.59 |
| 74 | fenbuconazole | 197.9＞129 | 10 | 128.9＞102.1 | 15 | 26.89 |
| 75 | fenitrothion | 277＞260 | 5 | 277＞109 | 20 | 14.6 |
| 76 | fenobucarb | 121＞103.1 | 15 | 121＞77.1 | 25 | 10.38 |
| 77 | fenothiocarb | 160.1＞72.1 | 15 | 72＞56 | 15 | 10.75 |
| 78 | fenpropathrin | 264.9＞210 | 10 | 207.9＞181 | 10 | 22.74 |
| 79 | fensulfothion | 291.8＞156 | 20 | 291.8＞108.8 | 20 | 19.32 |
| 80 | fenthion | 278＞169 | 20 | 278＞109 | 20 | 15.15 |
| 81 | fenthion sulfone | 309.9＞105 | 15 | 135.9＞92 | 10 | 19.51 |
| 82 | fenthion sulfoxide | 278＞169.1 | 20 | 278＞109.1 | 25 | 19.36 |
| 83 | fenvalerate | 224.9＞119 | 20 | 167＞125.1 | 15 | 29.26 |
| 84 | fipronil | 368.8＞214.8 | 35 | 366.8＞212.8 | 35 | 16.48 |
| 85 | fluazifop-butyl | 281.9＞238 | 20 | 281.9＞91 | 20 | 18.9 |
| 86 | flucythrinate | 198.9＞157 | 10 | 156.9＞107.1 | 15 | 27.94 |
| 87 | fludioxonil | 248＞182.1 | 15 | 248＞154.1 | 25 | 11.04 |
| 88 | fluorodifen | 190＞126.1 | 10 | 190＞75 | 25 | 17.75 |
| 89 | fluquinconazole | 340＞298 | 25 | 108＞57 | 20 | 26.14 |
| 90 | flutolanil | 280.9＞173 | 15 | 173＞145.1 | 20 | 17.79 |
| 91 | fluvalinate | 250＞200 | 25 | 250＞55 | 20 | 29.9 |
| 92 | fosthiazate | 195＞103 | 5 | 195＞60 | 25 | 15.73 |
| 93 | hexaconazole | 256＞82.1 | 10 | 231＞175 | 10 | 17.78 |
| 94 | hexazinone | 171＞85.1 | 20 | 171＞71.1 | 20 | 21.07 |
| 95 | iambda-cyhalothrin | 197＞161 | 5 | 197＞141 | 15 | 24.41 |
| 96 | iprobenfos | 203.9＞91 | 5 | 121.9＞121 | 15 | 13.12 |
| 97 | iprodione | 243.9＞187 | 15 | 187＞124 | 25 | 9.63 |
| 98 | isazofos | 161＞146 | 5 | 161＞119.1 | 10 | 12.89 |
| 99 | isocarnophos | 135.9＞108 | 15 | 135.9＞69 | 40 | 15.43 |
| 100 | isofenphos | 212.9＞185.1 | 5 | 212.9＞121.1 | 20 | 16.44 |
| 101 | isofenphos oxon | 229＞200.9 | 10 | 229＞121 | 30 | 15.38 |
| 102 | isofenphos-methyl | 241.1＞199.1 | 5 | 199＞121 | 15 | 15.98 |
| 103 | isoprocarb | 136＞121.1 | 10 | 121＞77.1 | 25 | 9.72 |
| 104 | isoprothiolane | 162.1＞134 | 5 | 162.1＞85 | 20 | 17.9 |
| 105 | isoxathion | 177.1＞130 | 10 | 177.1＞116.1 | 15 | 18.74 |
| 106 | kresoxim-methyl | 116＞89 | 15 | 116＞63 | 35 | 18.56 |
| 107 | malaoxon | 126.9＞99.1 | 5 | 126.9＞55 | 5 | 13.79 |
| 108 | malathion | 172.9＞99 | 15 | 126.9＞99 | 5 | 14.86 |
| 109 | mephosfolan | 196＞139.9 | 10 | 168＞139.9 | 5 | 10.55 |
| 110 | metalaxyl | 234＞146.1 | 20 | 220＞192.1 | 5 | 14.15 |
| 111 | methacrifos | 207.9＞180.1 | 5 | 207.9＞93 | 15 | 9.35 |
| 112 | methidathion | 144.9＞85 | 5 | 144.9＞58.1 | 15 | 17.01 |
| 113 | methoxychlor | 227.1＞121.1 | 20 | 227.1＞91.1 | 45 | 21.23 |
| 114 | metolachlor | 238＞162.2 | 15 | 162.2＞133.2 | 15 | 15.07 |
| 115 | mevinphos | 127＞109 | 10 | 127＞95 | 15 | 8.77 |
| 116 | molinate | 126.2＞83.1 | 5 | 126.2＞55.1 | 15 | 9.75 |
| 117 | monalinuron | 214＞61 | 10 | 126＞99 | 15 | 12.04 |
| 118 | myclobutanil | 179＞125.1 | 15 | 179＞90 | 35 | 18.35 |
| 119 | napropamide | 128＞100.1 | 10 | 128＞72.1 | 5 | 17.71 |
| 120 | nitrofen | 282.9＞253 | 10 | 202＞139.1 | 30 | 18.8 |
| 121 | oxadiazon | 174.9＞112 | 15 | 174.9＞76 | 40 | 18.22 |
| 122 | oxadixyl | 163＞132.1 | 10 | 163＞117.1 | 30 | 19.61 |
| 123 | oxyfluorfen | 252＞196 | 25 | 252＞146 | 40 | 18.39 |
| 124 | paclobutrazol | 236＞167 | 10 | 236＞125.1 | 15 | 17.1 |
| 125 | paraoxon | 148.9＞119 | 5 | 108.9＞91 | 5 | 14.18 |
| 126 | paraoxon-methyl | 229.9＞136.1 | 5 | 229.9＞106.1 | 20 | 12.8 |
| 127 | parathion | 290.9＞109 | 15 | 138.9＞109 | 5 | 15.24 |
| 128 | parathion-methyl | 262.9＞109 | 15 | 125＞47 | 15 | 13.97 |
| 129 | penconazole | 248＞192.1 | 15 | 248＞157.1 | 30 | 16.22 |
| 130 | pendimethalin | 251.8＞162.2 | 10 | 251.8＞161.1 | 20 | 16.16 |
| 131 | permethrin | 183.1＞168.1 | 15 | 183.1＞153 | 20 | 25.99 |
| 132 | phorate | 260＞75 | 5 | 230.9＞128.9 | 25 | 11.33 |
| 133 | phorate sulfone | 153＞97.1 | 10 | 124.9＞96.8 | 5 | 15.07 |
| 134 | phorate sulfoxide | 199＞142.9 | 10 | 96.9＞64.9 | 20 | 14.86 |
| 135 | phosalone | 182＞111 | 20 | 182＞102.1 | 20 | 23.66 |
| 136 | phosfolan | 196＞140.1 | 10 | 168＞140.1 | 5 | 16.34 |
| 137 | phosmet | 160＞133.1 | 15 | 160＞77.1 | 30 | 22.36 |
| 138 | phosphamidon | 127＞109 | 15 | 127＞95 | 20 | 12.6 |
| 139 | piperonyl butoxide | 176.1＞131.1 | 15 | 176.1＞103.1 | 30 | 21.47 |
| 140 | piperophos | 320＞122 | 15 | 140＞98.1 | 15 | 22.61 |
| 141 | pirimicarb | 238＞166.2 | 10 | 166＞55.1 | 25 | 13.22 |
| 142 | pirimiphos-ethyl | 318.1＞182 | 15 | 318.1＞166.1 | 15 | 15.82 |
| 143 | pirimiphos-methyl | 290＞125 | 25 | 232.9＞151 | 10 | 14.61 |
| 144 | pretilachlor | 262＞202 | 10 | 162.1＞132.2 | 20 | 18.06 |
| 145 | procymidone | 96＞67.1 | 10 | 96＞53.1 | 20 | 16.74 |
| 146 | profenofos | 338.8＞268.7 | 15 | 207.9＞63 | 40 | 17.99 |
| 147 | profluralin | 317.9＞199 | 20 | 317.9＞54.8 | 20 | 12.26 |
| 148 | prometryn | 226＞184.2 | 10 | 199＞184.1 | 5 | 14.12 |
| 149 | pronamide | 175＞147 | 15 | 173＞145 | 15 | 12.37 |
| 150 | propazine | 229.1＞58.1 | 15 | 214.2＞172.2 | 10 | 12.01 |
| 151 | propetamphos | 138＞110 | 10 | 138＞64 | 20 | 12.24 |
| 152 | propiconazole | 172.9＞145 | 15 | 172.9＞74 | 25 | 20.78 |
| 153 | propoxur | 110＞64 | 20 | 110＞63 | 35 | 10.42 |
| 154 | prothiofos | 308.9＞238.9 | 15 | 266.9＞239 | 10 | 17.79 |
| 155 | pyridaben | 147.2＞132.2 | 15 | 147.2＞117.1 | 25 | 25.97 |
| 156 | pyridaphenthion | 340＞199 | 5 | 204＞203.1 | 10 | 22.24 |
| 157 | pyriproxyfen | 136.1＞96 | 15 | 136.1＞78.1 | 30 | 23.83 |
| 158 | quinalphos | 146＞118 | 15 | 146＞91 | 30 | 16.54 |
| 159 | ronnel | 286.9＞272 | 20 | 285＞269.9 | 20 | 14.24 |
| 160 | simazine | 201.1＞186.2 | 5 | 201.1＞173.1 | 5 | 11.86 |
| 161 | sulfotep | 237.8＞145.9 | 15 | 201.8＞145.9 | 10 | 11.16 |
| 162 | tebuconazole | 250＞153 | 10 | 250＞125 | 25 | 21.17 |
| 163 | tebufenpyrad | 332.9＞171 | 25 | 275.9＞171.1 | 15 | 22.84 |
| 164 | tebupirimfos | 260.8＞137.2 | 20 | 233.9＞110.1 | 15 | 13.05 |
| 165 | terachlorvinphose | 330.9＞109 | 25 | 328.9＞109 | 25 | 17.28 |
| 166 | terbufos | 230.9＞175.1 | 15 | 230.9＞129.1 | 25 | 9.01 |
| 167 | terbufos sulfone | 198.9＞96.9 | 25 | 152.9＞96.9 | 10 | 16.21 |
| 168 | terbuthylazine | 228.9＞173.1 | 5 | 172.9＞172 | 10 | 12.27 |
| 169 | terbutryn | 241.1＞170.2 | 15 | 185＞170.1 | 5 | 14.49 |
| 170 | tetraconazole | 336＞217.9 | 20 | 336＞203.8 | 35 | 15.42 |
| 171 | tetradifon | 226.9＞199 | 15 | 158.9＞131 | 10 | 23.33 |
| 172 | tetramethrin | 164＞107.1 | 15 | 164＞77.1 | 30 | 22.5 |
| 173 | thionazin | 175＞79 | 10 | 143＞79 | 10 | 10.37 |
| 174 | tolclofos-methyl | 265＞250 | 15 | 265＞93 | 30 | 13.97 |
| 175 | triadimefon | 208＞181.1 | 5 | 208＞111 | 25 | 15.29 |
| 176 | triadimenol | 168＞70 | 10 | 128＞65 | 25 | 16.56 |
| 177 | triallate | 268＞184.1 | 25 | 142.9＞83 | 20 | 12.92 |
| 178 | triazophos | 161.2＞134.2 | 5 | 161.2＞106.1 | 15 | 20.08 |
| 179 | trichloronat | 298.8＞270.9 | 15 | 296.8＞268.9 | 15 | 15.59 |
| 180 | trifloxystrobin | 131＞89 | 35 | 116＞89 | 15 | 20.73 |
| 181 | vinclozolin | 197.9＞145 | 20 | 187＞124 | 25 | 13.81 |

Table S3 Linear range, correlation coefficient, detection limit and quantification limit of method validation data in green tea, black tea and dark tea matrices

| No | Pesticide | Green tea | | | |  | | | Black tea | | | |  | |  | | | Dark tea | | |
| --- | --- | --- | --- | --- | --- | --- | --- | --- | --- | --- | --- | --- | --- | --- | --- | --- | --- | --- | --- | --- |
| Linear range/(μg/kg) | R2 | LOQ(ug/L) | LOD(ug/L) | |  | Linear range/(μg/kg) | | R2 | LOQ(ug/L) | LOD(ug/L) | |  | | Linear range/(μg/kg) | R2 | | LOQ(ug/L) | LOD(ug/L) |
| 1 | aclonifen | 1-1000 | 0.991 | 10 | 5 | |  | 1-1000 | | 0.991 | 10 | 2 | |  | | 1-200 | 0.993 | | 10 | 2 |
| 2 | acrinathrin | 1-1000 | 0.991 | 10 | 5 | |  | 1-1000 | | 0.991 | 50 | 10 | |  | | 1-200 | 0.995 | | 10 | 5 |
| 3 | alachlor | 1-1000 | 0.992 | 10 | 2 | |  | 1-1000 | | 0.992 | 10 | 2 | |  | | 1-1000 | 0.998 | | 10 | 5 |
| 4 | aldrin | 1-1000 | 0.996 | 10 | 2 | |  | 1-200 | | 0.999 | 50 | 10 | |  | | 1-1000 | 0.998 | | 10 | 5 |
| 5 | ametryn | 1-1000 | 0.993 | 10 | 2 | |  | 1-1000 | | 0.992 | 10 | 2 | |  | | 1-1000 | 0.998 | | 10 | 2 |
| 6 | anilofos | 1-1000 | 0.993 | 10 | 5 | |  | 1-1000 | | 0.996 | 10 | 5 | |  | | 1-200 | 0.991 | | 10 | 5 |
| 7 | atratone | 1-1000 | 0.997 | 10 | 2 | |  | 1-1000 | | 0.994 | 10 | 2 | |  | | 1-1000 | 0.994 | | 10 | 5 |
| 8 | atrazine | 1-1000 | 0.993 | 10 | 5 | |  | 1-1000 | | 0.994 | 10 | 5 | |  | | 1-1000 | 0.996 | | 10 | 5 |
| 9 | atrazine-desethyl | 1-1000 | 0.996 | 10 | 5 | |  | 1-1000 | | 0.991 | 10 | 2 | |  | | 1-1000 | 0.998 | | 10 | 5 |
| 10 | azinphos-ethyl | 1-1000 | 0.991 | 10 | 5 | |  | 1-1000 | | 0.991 | 10 | 2 | |  | | 1-200 | 0.994 | | 10 | 5 |
| 11 | beflubutamid | 1-1000 | 0.993 | 10 | 5 | |  | 1-1000 | | 0.994 | 10 | 2 | |  | | 1-1000 | 0.992 | | 10 | 5 |
| 12 | benalaxyl | 1-1000 | 0.992 | 10 | 2 | |  | 1-1000 | | 0.994 | 10 | 5 | |  | | 1-1000 | 0.995 | | 5 | 2 |
| 13 | benfluralin | 1-1000 | 0.993 | 10 | 5 | |  | 1-1000 | | 0.991 | 10 | 5 | |  | | 1-200 | 0.991 | | 10 | 5 |
| 14 | BHC-alpha | 1-1000 | 0.996 | 10 | 5 | |  | 1-1000 | | 0.993 | 10 | 5 | |  | | 1-1000 | 0.997 | | 5 | 2 |
| 15 | BHC-beta | 1-1000 | 0.990 | 10 | 5 | |  | 1-1000 | | 0.993 | 10 | 2 | |  | | 1-1000 | 0.995 | | 5 | 2 |
| 16 | BHC-delta | 1-1000 | 0.992 | 10 | 5 | |  | 1-1000 | | 0.992 | 10 | 2 | |  | | 1-1000 | 0.995 | | 5 | 2 |
| 17 | BHC-gamma | 1-1000 | 0.993 | 10 | 5 | |  | 1-1000 | | 0.994 | 10 | 5 | |  | | 1-1000 | 0.994 | | 5 | 2 |
| 18 | bifenox | 1-1000 | 0.993 | 10 | 5 | |  | 1-1000 | | 0.995 | 10 | 2 | |  | | 1-1000 | 0.991 | | 10 | 5 |
| 19 | bifenthrin | 1-1000 | 0.991 | 10 | 5 | |  | 1-1000 | | 0.999 | 10 | 5 | |  | | 1-1000 | 0.996 | | 10 | 5 |
| 20 | boscalid | 1-500 | 0.997 | 10 | 2 | |  | 1-1000 | | 0.992 | 10 | 2 | |  | | 10-200 | 0.992 | | 10 | 5 |
| 21 | bromfenvinfos | 1-1000 | 0.996 | 10 | 2 | |  | 1-1000 | | 0.997 | 10 | 2 | |  | | 1-200 | 0.990 | | 10 | 5 |
| 22 | bromophos | 1-1000 | 0.991 | 10 | 5 | |  | 1-1000 | | 0.993 | 10 | 2 | |  | | 1-1000 | 0.992 | | 10 | 2 |
| 23 | bromopropylate | 1-500 | 0.997 | 10 | 2 | |  | 1-1000 | | 0.996 | 10 | 5 | |  | | 1-200 | 0.994 | | 10 | 5 |
| 24 | bupirimate | 1-1000 | 0.992 | 5 | 2 | |  | 1-1000 | | 0.993 | 50 | 10 | |  | | 1-1000 | 0.990 | | 50 | 10 |
| 25 | butamifos | 1-1000 | 0.990 | 10 | 5 | |  | 1-1000 | | 0.992 | 10 | 2 | |  | | 1-100 | 0.999 | | 10 | 5 |
| 26 | carbophenothion | 1-500 | 0.990 | 10 | 2 | |  | 1-1000 | | 0.990 | 10 | 5 | |  | | 1-200 | 0.992 | | 5 | 1 |
| 27 | chlordane-trans | 1-1000 | 0.990 | 10 | 5 | |  | 1-1000 | | 0.991 | 10 | 2 | |  | | 1-1000 | 0.999 | | 10 | 2 |
| 28 | chlorfenvinphos | 1-1000 | 0.991 | 10 | 5 | |  | 1-1000 | | 0.993 | 50 | 10 | |  | | 1-1000 | 0.992 | | 5 | 1 |
| 29 | chlorobenzilate | 1-500 | 0.996 | 10 | 5 | |  | 1-500 | | 0.993 | 10 | 2 | |  | | 1-1000 | 0.991 | | 10 | 5 |
| 30 | chloroneb | 1-1000 | 0.997 | 10 | 2 | |  | 1-1000 | | 0.997 | 10 | 2 | |  | | 1-1000 | 0.993 | | 10 | 5 |
| 31 | chlorpropham | 1-1000 | 0.992 | 10 | 5 | |  | 1-1000 | | 0.992 | 10 | 2 | |  | | 1-1000 | 0.995 | | 5 | 1 |
| 32 | chlorpyrifos | 1-1000 | 0.995 | 50 | 20 | |  | 1-1000 | | 0.994 | 10 | 5 | |  | | 1-1000 | 0.997 | | 10 | 5 |
| 33 | chlorpyrifos-methyl | 1-500 | 0.998 | 10 | 2 | |  | 1-200 | | 0.997 | 10 | 5 | |  | | 1-1000 | 0.992 | | 10 | 5 |
| 34 | clomazone | 1-1000 | 0.992 | 10 | 2 | |  | 1-1000 | | 0.995 | 10 | 2 | |  | | 1-1000 | 0.997 | | 10 | 5 |
| 35 | cycloate | 1-1000 | 0.997 | 10 | 5 | |  | 1-1000 | | 0.992 | 10 | 5 | |  | | 1-1000 | 0.995 | | 10 | 5 |
| 36 | cyflufenamid | 1-500 | 0.994 | 10 | 2 | |  | 1-1000 | | 0.991 | 10 | 2 | |  | | 1-1000 | 0.992 | | 10 | 5 |
| 37 | cyfluthrin | 1-1000 | 0.999 | 10 | 5 | |  | 1-1000 | | 0.999 | 10 | 5 | |  | | 1-200 | 0.997 | | 10 | 5 |
| 38 | cypermethrin | 1-1000 | 0.998 | 10 | 5 | |  | 1-1000 | | 0.992 | 10 | 5 | |  | | 1-200 | 0.997 | | 10 | 5 |
| 39 | cyproconazole | 1-500 | 0.995 | 10 | 2 | |  | 1-1000 | | 0.992 | 10 | 5 | |  | | 1-1000 | 0.992 | | 10 | 5 |
| 40 | DDD-o,p' | 1-1000 | 0.992 | 10 | 2 | |  | 1-1000 | | 0.990 | 10 | 2 | |  | | 1-1000 | 0.999 | | 10 | 5 |
| 41 | DDD-p,p' | 1-500 | 0.991 | 10 | 5 | |  | 1-1000 | | 0.993 | 10 | 2 | |  | | 1-1000 | 0.995 | | 10 | 5 |
| 42 | DDE-o,p' | 1-1000 | 0.991 | 10 | 2 | |  | 1-1000 | | 0.994 | 10 | 2 | |  | | 1-1000 | 1.000 | | 10 | 5 |
| 43 | DDE-p,p' | 1-1000 | 0.992 | 10 | 2 | |  | 1-1000 | | 0.992 | 10 | 5 | |  | | 1-1000 | 0.999 | | 10 | 5 |
| 44 | DDT-o,p' | 1-500 | 0.991 | 10 | 5 | |  | 1-1000 | | 0.992 | 10 | 2 | |  | | 1-1000 | 0.993 | | 10 | 5 |
| 45 | DDT-p,p' | 1-1000 | 0.991 | 10 | 5 | |  | 1-1000 | | 0.993 | 10 | 2 | |  | | 1-200 | 0.992 | | 10 | 5 |
| 46 | DEF | 1-1000 | 0.993 | 10 | 2 | |  | 1-1000 | | 0.991 | 10 | 2 | |  | | 1-1000 | 0.992 | | 10 | 5 |
| 47 | deltamethrin | 1-1000 | 0.990 | 10 | 5 | |  | 1-1000 | | 0.992 | 10 | 5 | |  | | 1-200 | 0.991 | | 10 | 2 |
| 48 | dichlofenthion | 1-1000 | 0.999 | 10 | 5 | |  | 1-1000 | | 0.991 | 5 | 2 | |  | | 1-1000 | 0.998 | | 10 | 5 |
| 49 | diclofop-methyl | 1-500 | 0.991 | 10 | 5 | |  | 1-1000 | | 0.995 | 10 | 5 | |  | | 1-1000 | 0.992 | | 10 | 5 |
| 50 | dicloran | 1-1000 | 0.996 | 50 | 10 | |  | 1-1000 | | 0.996 | 10 | 2 | |  | | 1-1000 | 0.991 | | 10 | 2 |
| 51 | dicofol | 1-1000 | 0.993 | 10 | 2 | |  | 1-1000 | | 0.993 | 10 | 2 | |  | | 1-1000 | 0.995 | | 10 | 5 |
| 52 | dicrotofos | 1-1000 | 0.991 | 10 | 5 | |  | 1-1000 | | 0.993 | 10 | 2 | |  | | 1-200 | 0.999 | | 10 | 2 |
| 53 | difenoconazole | 1-1000 | 0.993 | 10 | 5 | |  | 1-500 | | 0.992 | 10 | 2 | |  | | 1-200 | 0.997 | | 10 | 2 |
| 54 | dimethoate | 1-1000 | 0.991 | 10 | 5 | |  | 1-500 | | 0.995 | 10 | 5 | |  | | 1-200 | 0.993 | | 5 | 1 |
| 55 | dioxathion | 1-1000 | 0.998 | 10 | 5 | |  | 1-1000 | | 0.994 | 10 | 2 | |  | | 1-200 | 0.999 | | 10 | 5 |
| 56 | diphenylamine | 1-1000 | 0.996 | 10 | 5 | |  | 1-500 | | 0.994 | 10 | 2 | |  | | 1-1000 | 0.996 | | 10 | 5 |
| 57 | dipropetryn | 1-1000 | 0.992 | 5 | 2 | |  | 1-1000 | | 0.998 | 10 | 2 | |  | | 1-1000 | 0.994 | | 10 | 5 |
| 58 | edifenphos | 1-1000 | 0.995 | 10 | 5 | |  | 1-1000 | | 0.992 | 10 | 2 | |  | | 1-200 | 0.992 | | 10 | 5 |
| 59 | endosulfan-alpha | 1-1000 | 0.991 | 10 | 2 | |  | 1-1000 | | 0.997 | 10 | 5 | |  | | 1-1000 | 0.999 | | 10 | 5 |
| 60 | endosulfan-beta | 1-500 | 0.992 | 10 | 2 | |  | 1-1000 | | 0.993 | 10 | 2 | |  | | 1-1000 | 0.998 | | 10 | 5 |
| 61 | endrin | 1-500 | 0.994 | 10 | 2 | |  | 1-1000 | | 0.993 | 10 | 5 | |  | | 1-1000 | 0.996 | | 5 | 1 |
| 62 | EPN | 1-500 | 0.990 | 10 | 5 | |  | 1-1000 | | 0.994 | 10 | 5 | |  | | 1-200 | 0.996 | | 10 | 2 |
| 63 | epoxiconazole | 1-1000 | 0.990 | 10 | 5 | |  | 1-1000 | | 0.991 | 10 | 5 | |  | | 1-200 | 0.992 | | 10 | 2 |
| 64 | ethalfluralin | 1-1000 | 0.997 | 10 | 5 | |  | 1-1000 | | 0.993 | 10 | 2 | |  | | 1-200 | 0.992 | | 50 | 10 |
| 65 | ethion | 1-500 | 0.995 | 10 | 5 | |  | 1-1000 | | 0.994 | 10 | 5 | |  | | 1-1000 | 0.991 | | 10 | 5 |
| 66 | ethofumesate | 1-1000 | 0.993 | 10 | 5 | |  | 1-1000 | | 0.991 | 10 | 5 | |  | | 1-1000 | 0.997 | | 10 | 5 |
| 67 | ethoprophos | 1-1000 | 0.997 | 10 | 5 | |  | 1-1000 | | 0.992 | 10 | 2 | |  | | 1-1000 | 0.995 | | 10 | 5 |
| 68 | etoxazole | 1-1000 | 0.991 | 10 | 5 | |  | 1-1000 | | 0.993 | 10 | 5 | |  | | 1-1000 | 0.994 | | 10 | 5 |
| 69 | etrimfos | 1-1000 | 0.991 | 10 | 5 | |  | 1-1000 | | 0.995 | 10 | 2 | |  | | 1-1000 | 0.994 | | 10 | 5 |
| 70 | famphur | 1-1000 | 0.991 | 10 | 5 | |  | 1-1000 | | 0.994 | 10 | 5 | |  | | 2-500 | 0.993 | | 10 | 5 |
| 71 | fenamidone | 1-1000 | 0.992 | 10 | 5 | |  | 1-1000 | | 0.997 | 10 | 5 | |  | | 1-500 | 0.991 | | 10 | 5 |
| 72 | fenarimol | 1-1000 | 0.995 | 10 | 2 | |  | 1-1000 | | 0.993 | 10 | 2 | |  | | 1-200 | 0.993 | | 10 | 5 |
| 73 | fenbuconazole | 1-1000 | 0.992 | 10 | 2 | |  | 1-1000 | | 0.993 | 10 | 2 | |  | | 5-200 | 0.994 | | 10 | 5 |
| 74 | fenitrothion | 1-1000 | 0.996 | 10 | 5 | |  | 1-1000 | | 0.998 | 10 | 2 | |  | | 1-1000 | 0.990 | | 10 | 5 |
| 75 | fenobucarb | 1-1000 | 0.996 | 10 | 5 | |  | 1-500 | | 0.990 | 100 | 50 | |  | | 1-1000 | 0.998 | | 10 | 5 |
| 76 | fenothiocarb | 1-1000 | 0.992 | 10 | 5 | |  | 1-1000 | | 0.997 | 10 | 2 | |  | | 1-1000 | 0.996 | | 10 | 5 |
| 77 | fenpropathrin | 1-1000 | 0.995 | 10 | 5 | |  | 1-1000 | | 0.993 | 10 | 5 | |  | | 1-1000 | 0.991 | | 10 | 5 |
| 78 | fensulfothion | 1-200 | 0.991 | 10 | 2 | |  | 1-1000 | | 0.995 | 10 | 2 | |  | | 1-1000 | 0.991 | | 10 | 5 |
| 79 | fenthion sulfone | 1-500 | 0.993 | 10 | 5 | |  | 1-500 | | 0.995 | 10 | 5 | |  | | 1-1000 | 0.993 | | 5 | 2 |
| 80 | fenthion sulfoxide | 2-200 | 0.996 | 10 | 2 | |  | 1-1000 | | 0.991 | 10 | 5 | |  | | 20-500 | 0.993 | | 10 | 5 |
| 81 | fenthion | 1-1000 | 0.993 | 10 | 5 | |  | 1-1000 | | 0.993 | 10 | 2 | |  | | 1-1000 | 0.998 | | 10 | 5 |
| 82 | fenvalerate | 1-1000 | 0.997 | 10 | 5 | |  | 1-1000 | | 0.993 | 10 | 2 | |  | | 1-200 | 0.997 | | 10 | 5 |
| 83 | fipronil | 1-1000 | 0.994 | 10 | 5 | |  | 1-1000 | | 0.994 | 10 | 5 | |  | | 1-200 | 0.992 | | 10 | 5 |
| 84 | fluazifop-butyl | 1-500 | 0.995 | 10 | 5 | |  | 1-500 | | 0.992 | 10 | 2 | |  | | 1-1000 | 0.992 | | 5 | 1 |
| 85 | flucythrinate | 1-1000 | 0.994 | 10 | 5 | |  | 1-1000 | | 0.994 | 10 | 5 | |  | | 1-200 | 0.995 | | 10 | 5 |
| 86 | fludioxonil | 1-1000 | 0.995 | 10 | 2 | |  | 1-1000 | | 0.997 | 10 | 5 | |  | | 1-1000 | 0.991 | | 10 | 5 |
| 87 | fluorodifen | 5-1000 | 0.990 | 10 | 5 | |  | 1-1000 | | 0.994 | 10 | 5 | |  | | 1-200 | 0.993 | | 10 | 5 |
| 88 | fluquinconazole | 1-1000 | 0.994 | 5 | 2 | |  | 1-200 | | 0.995 | 10 | 2 | |  | | 1-200 | 0.992 | | 10 | 5 |
| 89 | flutolanil | 1-1000 | 0.995 | 10 | 5 | |  | 1-1000 | | 0.996 | 10 | 2 | |  | | 1-1000 | 0.991 | | 5 | 1 |
| 90 | fluvalinate | 1-500 | 0.992 | 10 | 5 | |  | 1-500 | | 0.990 | 10 | 5 | |  | | 1-200 | 0.995 | | 10 | 5 |
| 91 | fosthiazate | 1-1000 | 0.991 | 10 | 5 | |  | 1-500 | | 0.990 | 10 | 2 | |  | | 1-200 | 0.999 | | 10 | 5 |
| 92 | hexaconazole | 1-1000 | 0.996 | 10 | 5 | |  | 1-1000 | | 0.994 | 10 | 2 | |  | | 1-1000 | 0.996 | | 10 | 5 |
| 93 | hexazinone | 1-500 | 0.990 | 10 | 5 | |  | 1-1000 | | 0.994 | 10 | 2 | |  | | 1-1000 | 0.990 | | 10 | 5 |
| 94 | iambda-cyhalothrin | 1-1000 | 0.991 | 10 | 5 | |  | 1-1000 | | 0.994 | 10 | 5 | |  | | 1-200 | 0.992 | | 5 | 1 |
| 95 | iprobenfos | 1-1000 | 0.999 | 10 | 5 | |  | 1-1000 | | 0.991 | 10 | 2 | |  | | 1-1000 | 0.991 | | 10 | 5 |
| 96 | iprodione | 1-1000 | 0.994 | 10 | 5 | |  | 1-1000 | | 0.992 | 10 | 5 | |  | | 10-500 | 0.992 | | 10 | 5 |
| 97 | isazofos | 1-1000 | 0.991 | 10 | 5 | |  | 1-1000 | | 0.991 | 10 | 5 | |  | | 1-1000 | 0.992 | | 5 | 1 |
| 98 | isocarnophos | 1-1000 | 0.991 | 10 | 5 | |  | 1-1000 | | 0.995 | 10 | 2 | |  | | 1-200 | 0.994 | | 10 | 5 |
| 99 | isofenphos oxon | 1-1000 | 0.991 | 10 | 5 | |  | 1-500 | | 0.996 | 10 | 5 | |  | | 1-1000 | 0.993 | | 10 | 5 |
| 100 | isofenphos | 1-1000 | 0.992 | 10 | 5 | |  | 1-1000 | | 0.992 | 10 | 2 | |  | | 2-100 | 0.994 | | 10 | 5 |
| 101 | isofenphos-methyl | 1-1000 | 0.994 | 10 | 5 | |  | 1-1000 | | 0.990 | 10 | 2 | |  | | 1-1000 | 0.991 | | 10 | 5 |
| 102 | isoprocarb | 1-1000 | 0.996 | 50 | 10 | |  | 1-500 | | 0.991 | 10 | 5 | |  | | 1-1000 | 0.995 | | 10 | 5 |
| 103 | isoprothiolane | 1-1000 | 0.994 | 10 | 2 | |  | 1-1000 | | 0.996 | 10 | 2 | |  | | 1-1000 | 0.996 | | 5 | 1 |
| 104 | isoxathion | 1-100 | 0.993 | 10 | 5 | |  | 1-1000 | | 0.998 | 10 | 5 | |  | | 1-200 | 0.990 | | 10 | 5 |
| 105 | kresoxim-methyl | 1-1000 | 0.994 | 10 | 5 | |  | 1-500 | | 0.993 | 10 | 5 | |  | | 1-1000 | 0.994 | | 10 | 5 |
| 106 | malaoxon | 1-500 | 0.996 | 10 | 5 | |  | 1-1000 | | 0.991 | 10 | 2 | |  | | 1-1000 | 0.992 | | 10 | 5 |
| 107 | malathion | 1-1000 | 0.991 | 10 | 5 | |  | 1-1000 | | 0.995 | 10 | 5 | |  | | 1-200 | 0.990 | | 10 | 5 |
| 108 | mephosfolan | 1-1000 | 0.996 | 10 | 5 | |  | 1-1000 | | 0.991 | 10 | 5 | |  | | 1-200 | 0.992 | | 10 | 5 |
| 109 | metalaxyl | 1-1000 | 0.991 | 10 | 2 | |  | 1-1000 | | 0.997 | 10 | 2 | |  | | 1-1000 | 0.997 | | 10 | 5 |
| 110 | methacrifos | 1-1000 | 0.993 | 10 | 2 | |  | 1-1000 | | 0.993 | 10 | 2 | |  | | 1-1000 | 0.998 | | 10 | 5 |
| 111 | methidathion | 1-1000 | 0.991 | 10 | 5 | |  | 1-1000 | | 0.990 | 10 | 2 | |  | | 1-1000 | 0.992 | | 10 | 5 |
| 112 | methoxychlor | 1-500 | 0.993 | 10 | 5 | |  | 1-1000 | | 0.991 | 10 | 5 | |  | | 1-1000 | 0.991 | | 10 | 5 |
| 113 | metolachlor | 1-1000 | 0.996 | 10 | 2 | |  | 1-1000 | | 0.997 | 10 | 2 | |  | | 1-1000 | 0.995 | | 10 | 5 |
| 114 | mevinphos | 1-1000 | 0.997 | 10 | 2 | |  | 1-1000 | | 0.994 | 10 | 2 | |  | | 1-1000 | 0.991 | | 10 | 5 |
| 115 | molinate | 1-1000 | 0.996 | 10 | 5 | |  | 1-1000 | | 0.994 | 10 | 2 | |  | | 1-1000 | 0.994 | | 5 | 1 |
| 116 | monolinuron | 1-1000 | 0.993 | 10 | 5 | |  | 1-1000 | | 0.995 | 10 | 2 | |  | | 1-1000 | 0.994 | | 10 | 5 |
| 117 | myclobutanil | 1-1000 | 0.993 | 10 | 2 | |  | 1-1000 | | 0.993 | 10 | 2 | |  | | 1-1000 | 0.992 | | 10 | 5 |
| 118 | napropamide | 1-1000 | 0.997 | 10 | 5 | |  | 1-1000 | | 0.991 | 10 | 2 | |  | | 1-1000 | 0.996 | | 10 | 5 |
| 119 | nitrofen | 1-1000 | 0.991 | 10 | 5 | |  | 1-1000 | | 0.996 | 10 | 2 | |  | | 1-500 | 0.992 | | 10 | 5 |
| 120 | oxadiazon | 1-1000 | 0.991 | 10 | 2 | |  | 1-1000 | | 0.996 | 10 | 2 | |  | | 1-1000 | 0.997 | | 10 | 5 |
| 121 | oxadixyl | 1-500 | 0.995 | 10 | 2 | |  | 1-1000 | | 0.997 | 10 | 5 | |  | | 1-1000 | 0.995 | | 10 | 5 |
| 122 | oxyfluorfen | 1-1000 | 0.991 | 10 | 2 | |  | 1-1000 | | 0.995 | 10 | 2 | |  | | 1-200 | 0.991 | | 10 | 2 |
| 123 | paclobutrazol | 1-1000 | 0.991 | 10 | 2 | |  | 1-1000 | | 0.991 | 10 | 5 | |  | | 1-1000 | 0.990 | | 10 | 5 |
| 124 | paraoxon | 1-1000 | 0.993 | 10 | 5 | |  | 1-1000 | | 0.991 | 10 | 2 | |  | | 1-1000 | 0.992 | | 5 | 1 |
| 125 | paraoxon-methyl | 1-1000 | 0.991 | 10 | 5 | |  | 1-1000 | | 0.996 | 10 | 2 | |  | | 1-1000 | 0.993 | | 10 | 5 |
| 126 | parathion | 1-1000 | 0.991 | 10 | 5 | |  | 1-1000 | | 0.990 | 10 | 2 | |  | | 2-200 | 0.990 | | 10 | 5 |
| 127 | parathion-methyl | 1-1000 | 0.991 | 10 | 2 | |  | 1-500 | | 0.992 | 10 | 2 | |  | | 1-1000 | 0.995 | | 10 | 5 |
| 128 | penconazole | 1-1000 | 0.991 | 10 | 2 | |  | 1-1000 | | 0.996 | 10 | 2 | |  | | 1-1000 | 0.992 | | 10 | 5 |
| 129 | pendimethalin | 1-500 | 0.994 | 10 | 2 | |  | 1-1000 | | 0.992 | 10 | 2 | |  | | 1-200 | 0.991 | | 10 | 5 |
| 130 | permethrin | 1-1000 | 0.991 | 10 | 2 | |  | 1-1000 | | 0.993 | 10 | 5 | |  | | 1-200 | 0.995 | | 10 | 5 |
| 131 | phorate sulfone | 1-1000 | 0.991 | 10 | 5 | |  | 1-1000 | | 0.997 | 10 | 2 | |  | | 1-1000 | 0.992 | | 5 | 1 |
| 132 | phorate sulfoxide | 1-1000 | 0.998 | 10 | 5 | |  | 1-1000 | | 0.991 | 10 | 5 | |  | | 1-200 | 0.991 | | 5 | 1 |
| 133 | phorate | 1-1000 | 0.994 | 10 | 2 | |  | 1-1000 | | 0.992 | 10 | 2 | |  | | 1-500 | 0.993 | | 10 | 5 |
| 134 | phosalone | 1-1000 | 0.991 | 10 | 5 | |  | 1-1000 | | 0.991 | 10 | 2 | |  | | 1-100 | 0.992 | | 10 | 2 |
| 135 | phosfolan | 1-1000 | 0.997 | 10 | 5 | |  | 1-1000 | | 0.991 | 10 | 2 | |  | | 10-1000 | 0.994 | | 10 | 5 |
| 136 | phosmet | 1-1000 | 0.992 | 10 | 5 | |  | 1-1000 | | 0.997 | 10 | 2 | |  | | 5-200 | 0.993 | | 10 | 2 |
| 137 | phosphamidon | 1-1000 | 0.998 | 10 | 5 | |  | 1-1000 | | 0.991 | 10 | 5 | |  | | 1-500 | 0.993 | | 10 | 5 |
| 138 | piperonyl butoxide | 1-1000 | 0.997 | 10 | 5 | |  | 1-1000 | | 0.993 | 10 | 5 | |  | | 1-200 | 0.992 | | 10 | 5 |
| 139 | piperophos | 1-1000 | 0.993 | 10 | 5 | |  | 1-1000 | | 0.997 | 10 | 5 | |  | | 1-200 | 0.991 | | 10 | 5 |
| 140 | pirimicarb | 20-1000 | 0.998 | 20 | 5 | |  | 1-1000 | | 0.990 | 10 | 2 | |  | | 1-1000 | 0.999 | | 10 | 5 |
| 141 | pirimiphos-ethyl | 1-500 | 0.998 | 10 | 2 | |  | 1-1000 | | 0.999 | 10 | 2 | |  | | 1-1000 | 0.992 | | 10 | 5 |
| 142 | pirimiphos-methyl | 1-1000 | 0.991 | 10 | 5 | |  | 1-500 | | 0.992 | 10 | 2 | |  | | 1-1000 | 0.991 | | 10 | 5 |
| 143 | pretilachlor | 1-1000 | 0.993 | 10 | 2 | |  | 1-500 | | 0.993 | 10 | 2 | |  | | 1-1000 | 0.996 | | 10 | 5 |
| 144 | procymidone | 5-1000 | 0.991 | 5 | 2 | |  | 1-1000 | | 0.990 | 10 | 5 | |  | | 1-1000 | 0.991 | | 5 | 1 |
| 145 | profenofos | 1-1000 | 0.993 | 10 | 2 | |  | 1-1000 | | 0.994 | 10 | 2 | |  | | 1-200 | 0.994 | | 10 | 5 |
| 146 | profluralin | 1-1000 | 0.995 | 10 | 5 | |  | 1-1000 | | 0.993 | 10 | 2 | |  | | 1-200 | 0.991 | | 5 | 1 |
| 147 | prometryn | 1-1000 | 0.992 | 10 | 2 | |  | 1-1000 | | 0.991 | 10 | 2 | |  | | 1-1000 | 0.997 | | 10 | 5 |
| 148 | pronamide | 1-1000 | 0.992 | 10 | 5 | |  | 1-1000 | | 0.990 | 10 | 2 | |  | | 1-1000 | 0.993 | | 10 | 5 |
| 149 | propazine | 1-1000 | 0.991 | 10 | 5 | |  | 1-1000 | | 0.998 | 10 | 2 | |  | | 1-1000 | 0.998 | | 10 | 5 |
| 150 | propetamphos | 1-1000 | 0.991 | 10 | 5 | |  | 1-1000 | | 0.992 | 10 | 5 | |  | | 1-1000 | 0.992 | | 5 | 1 |
| 151 | propiconazole | 1-500 | 0.991 | 10 | 2 | |  | 1-1000 | | 0.995 | 10 | 2 | |  | | 1-1000 | 0.995 | | 10 | 5 |
| 152 | propoxur | 1-1000 | 0.994 | 10 | 5 | |  | 1-1000 | | 0.995 | 10 | 5 | |  | | 1-1000 | 0.994 | | 10 | 5 |
| 153 | prothiofos | 1-1000 | 0.994 | 10 | 2 | |  | 1-1000 | | 0.995 | 10 | 2 | |  | | 1-1000 | 0.993 | | 10 | 5 |
| 154 | pyridaben | 1-1000 | 0.993 | 10 | 2 | |  | 1-1000 | | 0.991 | 10 | 5 | |  | | 2-200 | 0.991 | | 10 | 5 |
| 155 | pyridaphenthion | 1-1000 | 0.995 | 10 | 5 | |  | 1-1000 | | 0.991 | 10 | 5 | |  | | 2-200 | 0.992 | | 10 | 5 |
| 156 | pyriproxyfen | 1-1000 | 0.990 | 10 | 5 | |  | 1-1000 | | 0.992 | 10 | 2 | |  | | 1-200 | 0.991 | | 10 | 5 |
| 157 | quinalphos | 1-1000 | 0.992 | 10 | 5 | |  | 1-1000 | | 0.999 | 10 | 2 | |  | | 1-1000 | 0.991 | | 10 | 5 |
| 158 | ronnel | 1-1000 | 0.994 | 10 | 2 | |  | 1-1000 | | 0.990 | 10 | 2 | |  | | 1-1000 | 0.992 | | 10 | 5 |
| 159 | simazine | 1-1000 | 0.992 | 10 | 5 | |  | 1-1000 | | 0.993 | 10 | 2 | |  | | 1-1000 | 0.995 | | 10 | 2 |
| 160 | sulfotep | 1-1000 | 0.998 | 10 | 5 | |  | 1-1000 | | 0.995 | 10 | 2 | |  | | 1-1000 | 0.992 | | 10 | 5 |
| 161 | tebuconazole | 1-1000 | 0.991 | 10 | 2 | |  | 1-1000 | | 0.995 | 10 | 2 | |  | | 1-200 | 0.991 | | 10 | 5 |
| 162 | tebufenpyrad | 1-1000 | 0.991 | 10 | 2 | |  | 1-1000 | | 0.994 | 10 | 5 | |  | | 1-1000 | 0.990 | | 10 | 5 |
| 163 | tebupirimfos | 1-1000 | 0.991 | 10 | 5 | |  | 1-1000 | | 0.996 | 100 | 50 | |  | | 1-1000 | 0.994 | | 10 | 5 |
| 164 | terachlorvinphose | 1-1000 | 0.994 | 10 | 2 | |  | 1-1000 | | 0.993 | 10 | 5 | |  | | 1-200 | 0.991 | | 10 | 5 |
| 165 | terbufos sulfone | 1-1000 | 0.997 | 10 | 5 | |  | 1-1000 | | 0.990 | 10 | 5 | |  | | 1-1000 | 0.997 | | 10 | 2 |
| 166 | terbufos | 1-1000 | 0.992 | 10 | 2 | |  | 1-1000 | | 0.991 | 10 | 2 | |  | | 1-1000 | 0.992 | | 10 | 5 |
| 167 | terbuthylazine | 1-1000 | 0.996 | 10 | 2 | |  | 1-1000 | | 0.990 | 10 | 2 | |  | | 1-1000 | 0.998 | | 10 | 5 |
| 168 | terbutryn | 1-1000 | 0.991 | 10 | 2 | |  | 1-1000 | | 0.992 | 10 | 2 | |  | | 1-1000 | 0.996 | | 10 | 5 |
| 169 | tetraconazole | 1-1000 | 0.995 | 10 | 5 | |  | 1-1000 | | 0.992 | 10 | 2 | |  | | 1-1000 | 0.994 | | 10 | 5 |
| 170 | tetradifon | 1-1000 | 0.992 | 10 | 2 | |  | 1-500 | | 0.996 | 10 | 2 | |  | | 1-1000 | 0.992 | | 10 | 5 |
| 171 | tetramethrin | 1-500 | 0.994 | 10 | 5 | |  | 1-1000 | | 0.993 | 10 | 5 | |  | | 1-200 | 0.994 | | 10 | 5 |
| 172 | thiobencarb | 1-1000 | 0.992 | 10 | 2 | |  | 1-1000 | | 0.995 | 10 | 2 | |  | | 1-1000 | 0.996 | | 10 | 5 |
| 173 | thionazin | 1-1000 | 0.996 | 10 | 5 | |  | 1-1000 | | 0.995 | 10 | 2 | |  | | 1-1000 | 0.997 | | 10 | 5 |
| 174 | tolclofos-methyl | 1-1000 | 0.992 | 10 | 2 | |  | 1-1000 | | 0.995 | 10 | 2 | |  | | 1-1000 | 0.997 | | 10 | 5 |
| 175 | triadimefon | 1-500 | 0.992 | 10 | 5 | |  | 1-1000 | | 0.996 | 10 | 2 | |  | | 1-1000 | 0.991 | | 10 | 5 |
| 176 | triadimenol | 1-1000 | 0.992 | 10 | 5 | |  | 1-1000 | | 0.991 | 10 | 2 | |  | | 1-1000 | 0.992 | | 10 | 5 |
| 177 | triallate | 1-1000 | 0.991 | 10 | 5 | |  | 1-1000 | | 0.990 | 10 | 2 | |  | | 1-1000 | 0.997 | | 10 | 5 |
| 178 | triazophos | 1-500 | 0.993 | 10 | 5 | |  | 1-1000 | | 0.994 | 10 | 2 | |  | | 1-1000 | 0.992 | | 10 | 5 |
| 179 | trichloronat | 1-500 | 0.992 | 50 | 10 | |  | 1-500 | | 0.991 | 10 | 2 | |  | | 1-1000 | 0.995 | | 10 | 5 |
| 180 | trifloxystrobin | 1-1000 | 0.992 | 10 | 5 | |  | 1-1000 | | 0.997 | 10 | 2 | |  | | 1-1000 | 0.991 | | 5 | 2 |
| 181 | vinclozolin | 1-500 | 0.999 | 10 | 5 | |  | 1-1000 | | 0.997 | 10 | 5 | |  | | 1-1000 | 0.999 | | 5 | 1 |

**Fig S1** Similarities and differences between corresponding and non-corresponding matrix quantification results
